# Supplementary material for: Surface modification of LaFeO3 by Co-Pi electrochemical deposition as an efficient photoanode under visible light
Source: Royal Society of Chemistry journal article supplement (doi:10.1039/c6ra01810f), 2016-01-01
Supplement: c6ra01810f1.pdf [file c6ra01810f1.pdf]

## Supplementary Information

# Surface modification of LaFeO<sub>3</sub> by Co-Pi electrochemical deposition as an efficient photoanode under visible light

Qi Peng,<sup>a</sup> Jun Wang,<sup>b</sup> Yanwei Wen,<sup>b\*</sup> Bin Shan<sup>b</sup> and Rong Chen<sup>a, c\*\*</sup>

<sup>a</sup> State Key Laboratory of Digital Manufacturing Equipment and Technology, School of Mechanical Science and Engineering, Huazhong University of Science and Technology, Wuhan 430074, Hubei, People's Republic of China.

<sup>b</sup> State Key Laboratory of Materials Processing and Die & Mould Technology, School of Materials Science and Engineering, Huazhong University of Science and Technology, Wuhan 430074, Hubei, People's Republic of China.

<sup>c</sup> School of Optical and Electronic Information, Huazhong University of Science and Technology, Wuhan 430074, People's Republic of China.

---

\* E-mail address: [ywwen@hust.edu.cn](mailto:ywwen@hust.edu.cn) (Y.W. Wen)

\*\* E-mail address: [rongchen@hust.edu.cn](mailto:rongchen@hust.edu.cn) (R. Chen)

## Figurers Captions

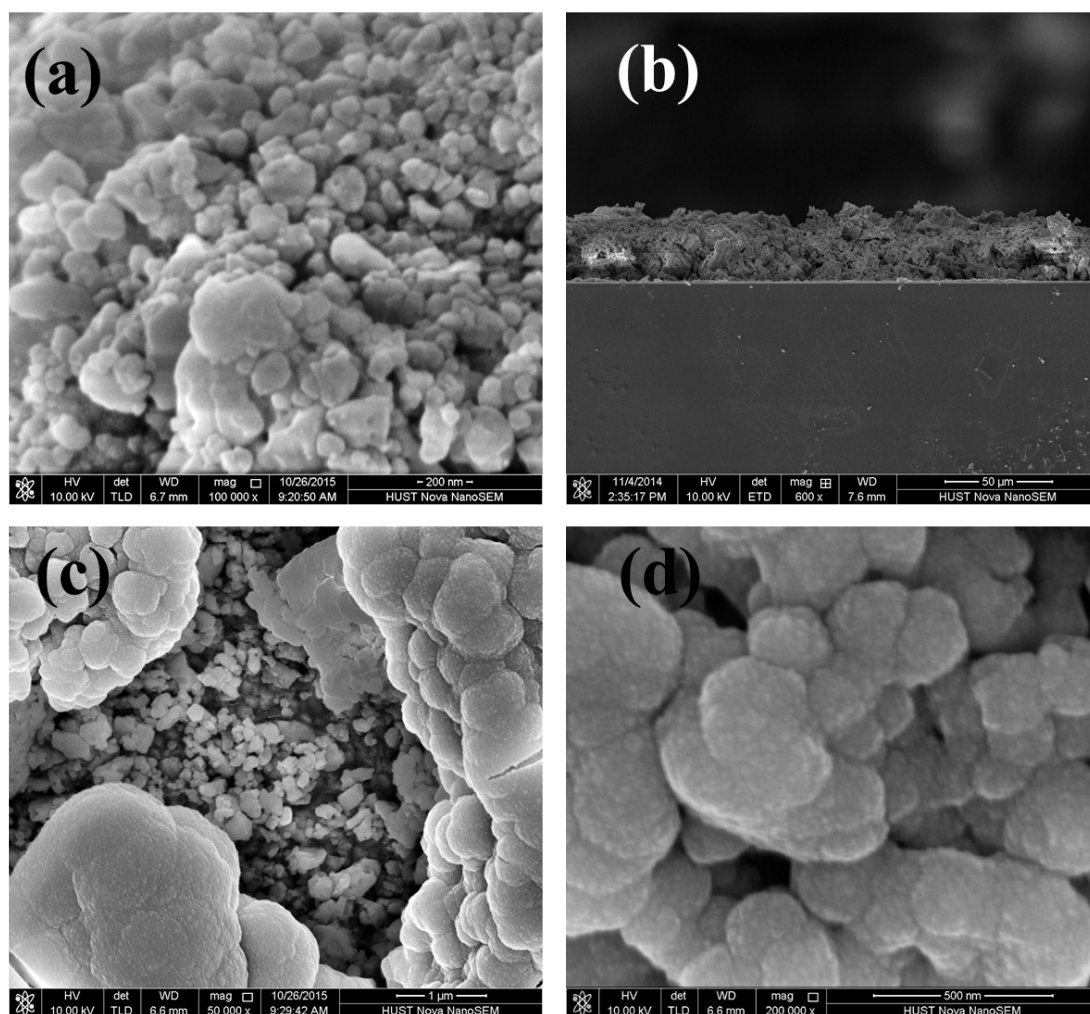

**Fig. S1.** SEM images (a) High-Resolution SEM images of LaFeO<sub>3</sub> films, (b) the cross view of LaFeO<sub>3</sub> films on FTO, (c) local view of LaFeO<sub>3</sub>/Co-Pi 5 with LaFeO<sub>3</sub> and Co-Pi and (d) local view of LaFeO<sub>3</sub>/Co-Pi 5 with Co-Pi.

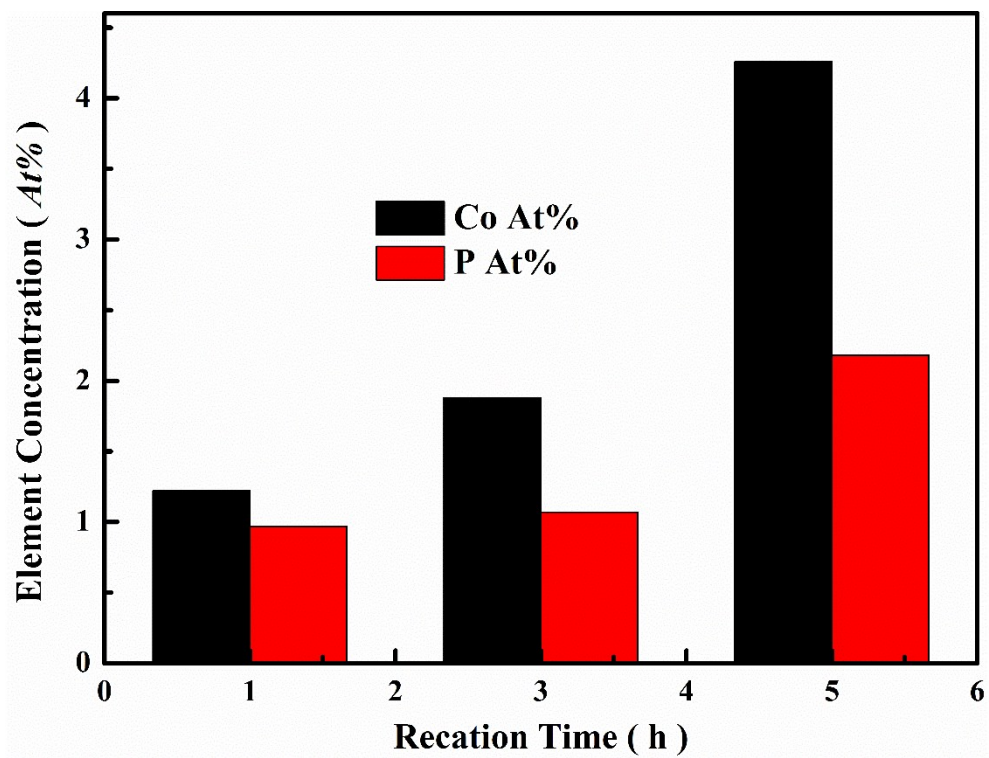

**Fig. S2.** Co and P atomic concentration of LaFeO<sub>3</sub>, LaFeO<sub>3</sub>/Co-Pi 1, LaFeO<sub>3</sub>/Co-Pi 3 and LaFeO<sub>3</sub>/Co-Pi 5 photoelectrode.

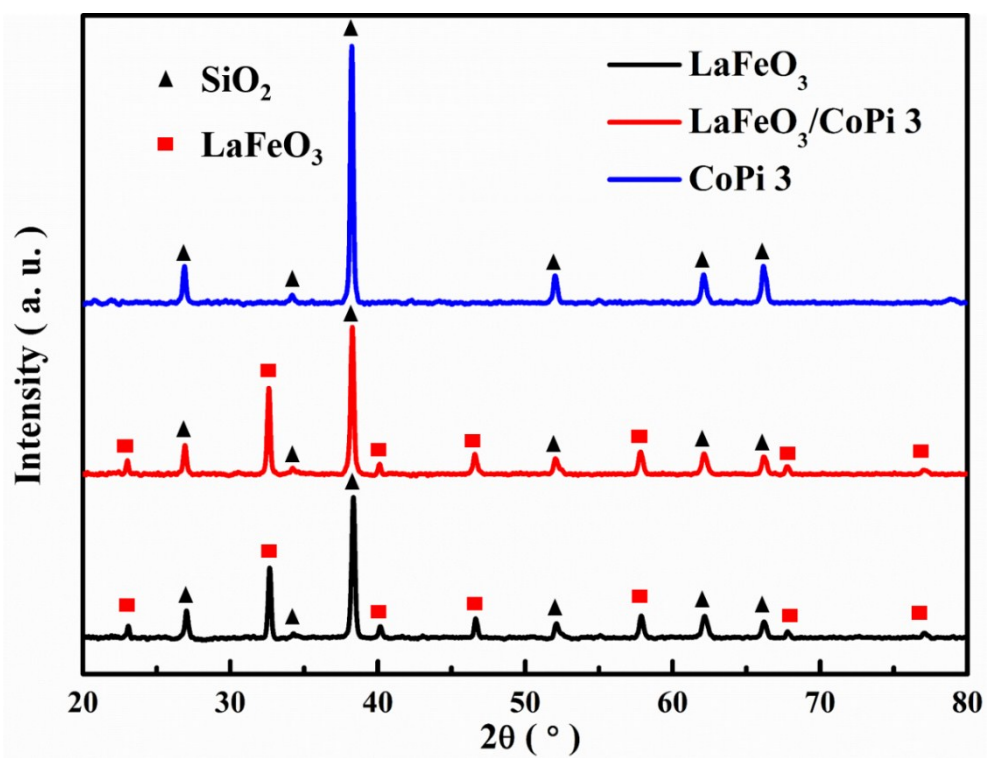

**Fig. S3.** XRD spectrum of pure LaFeO<sub>3</sub>, pure Co-Pi 3 and LaFeO<sub>3</sub>/Co-Pi 3.

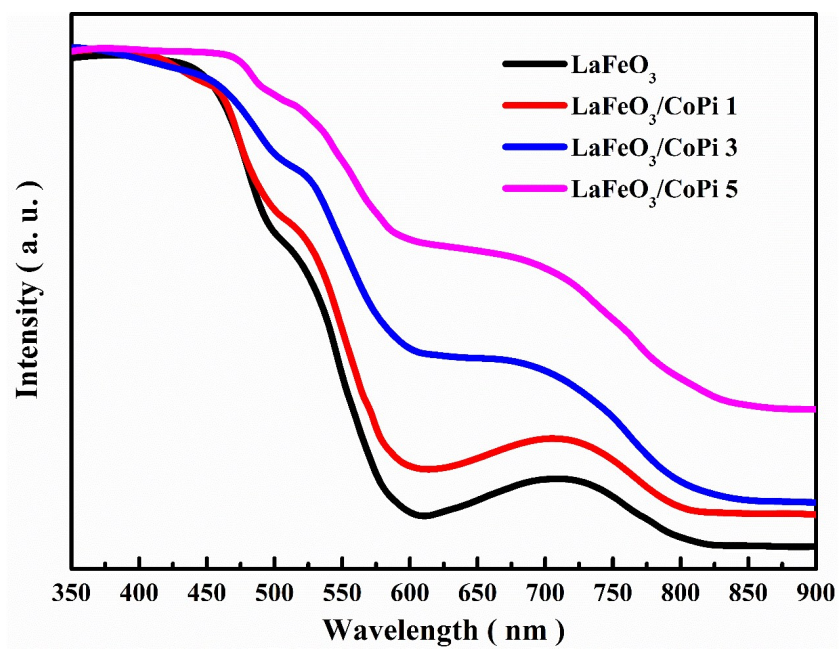

**Fig. S4.** The UV-vis adsorption spectra of LaFeO<sub>3</sub>, LaFeO<sub>3</sub>/Co-Pi 1, LaFeO<sub>3</sub>/Co-Pi 3 and LaFeO<sub>3</sub>/Co-Pi 5 photoelectrode.

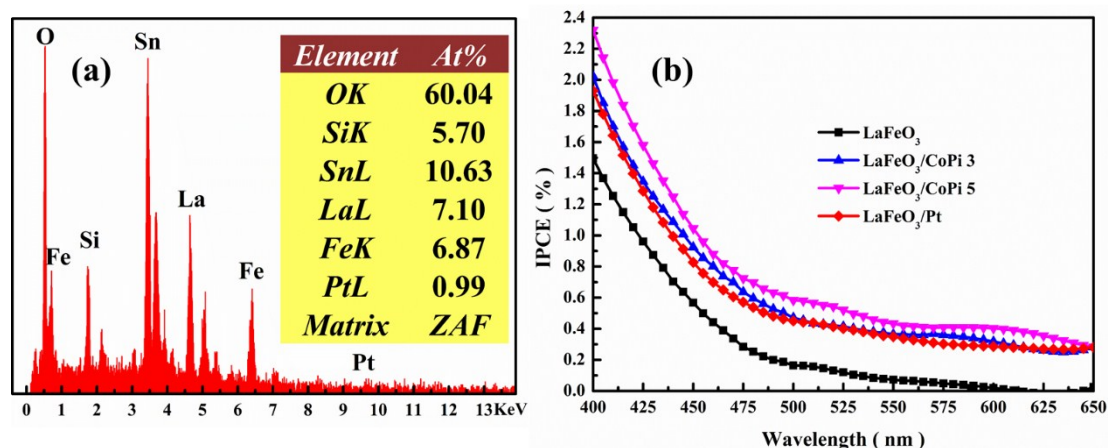

**Fig. S5.** (a) EDX of LaFeO<sub>3</sub>/Pt and (b) IPCE of LaFeO<sub>3</sub>/Pt compared with those of LaFeO<sub>3</sub>/Co-Pi 3 and 5.

In the water splitting process, novel metal Pt is a commonly used co-catalyst on LaFeO<sub>3</sub> to enhance the hydrogen evolution reaction (HER), while Co-Pi usually improves the oxygen evolution reaction (OER). For a comparison, the ~1% Pt loaded LaFeO<sub>3</sub> (See Fig. S5(a)) has been prepared and its IPCE test (Fig. S5(b)) suggests that the promotion by Pt co-catalyst approaches to that of LaFeO<sub>3</sub>/Co-Pi 3 sample, which is about 1.3 times that of the pristine LaFeO<sub>3</sub>. This is in a good agreement with Tijare's work [1] where Pt loading promotes the hydrogen generation rate of LaFeO<sub>3</sub> powers by ~1.3 times. These results demonstrate that the PEC performance of Co-Pi coated LaFeO<sub>3</sub> is comparable to that of Pt loaded one, and LaFeO<sub>3</sub>/Co-Pi 5 even exhibits a better performance than Pt co-catalyst. Consider the low cost of Co-pi and the abundance of both cobalt and phosphorus, the Co-Pi shows great potential to improve the surface chemical kinetics for practical applications.

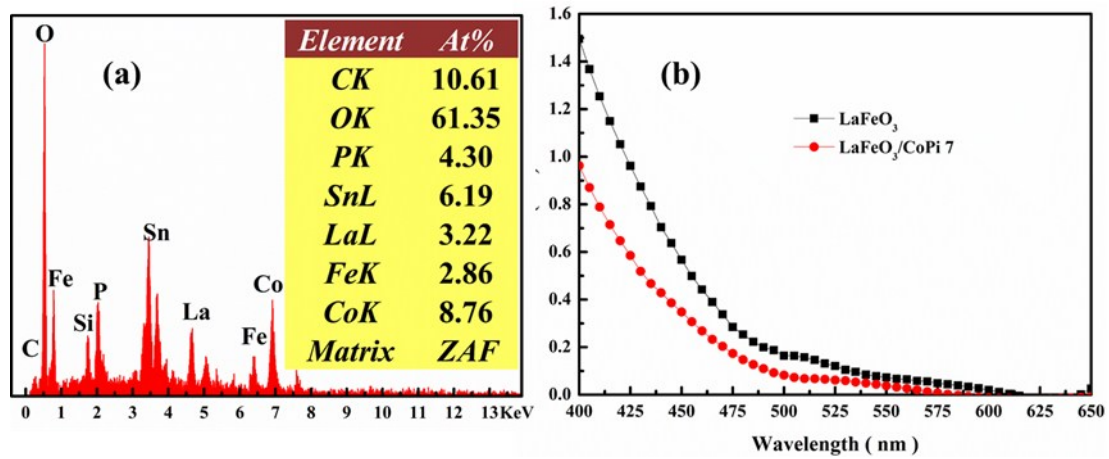

**Fig. S6.** (a) EDX of LaFeO<sub>3</sub>/Co-Pi 7 and (b) IPCE of LaFeO<sub>3</sub>/Co-Pi 7 compared with those of LaFeO<sub>3</sub>.
